# Supplementary material for: Protection of Inonotus hispidus (Bull.) P. Karst. against Chronic Alcohol-Induced Liver Injury in Mice via Its Relieving Inflammation Response
Source: MDPI journal article supplement (doi:10.3390/nu15163530), 2023-08-10
Supplement: s1 [file s1]

## Supplementary Data

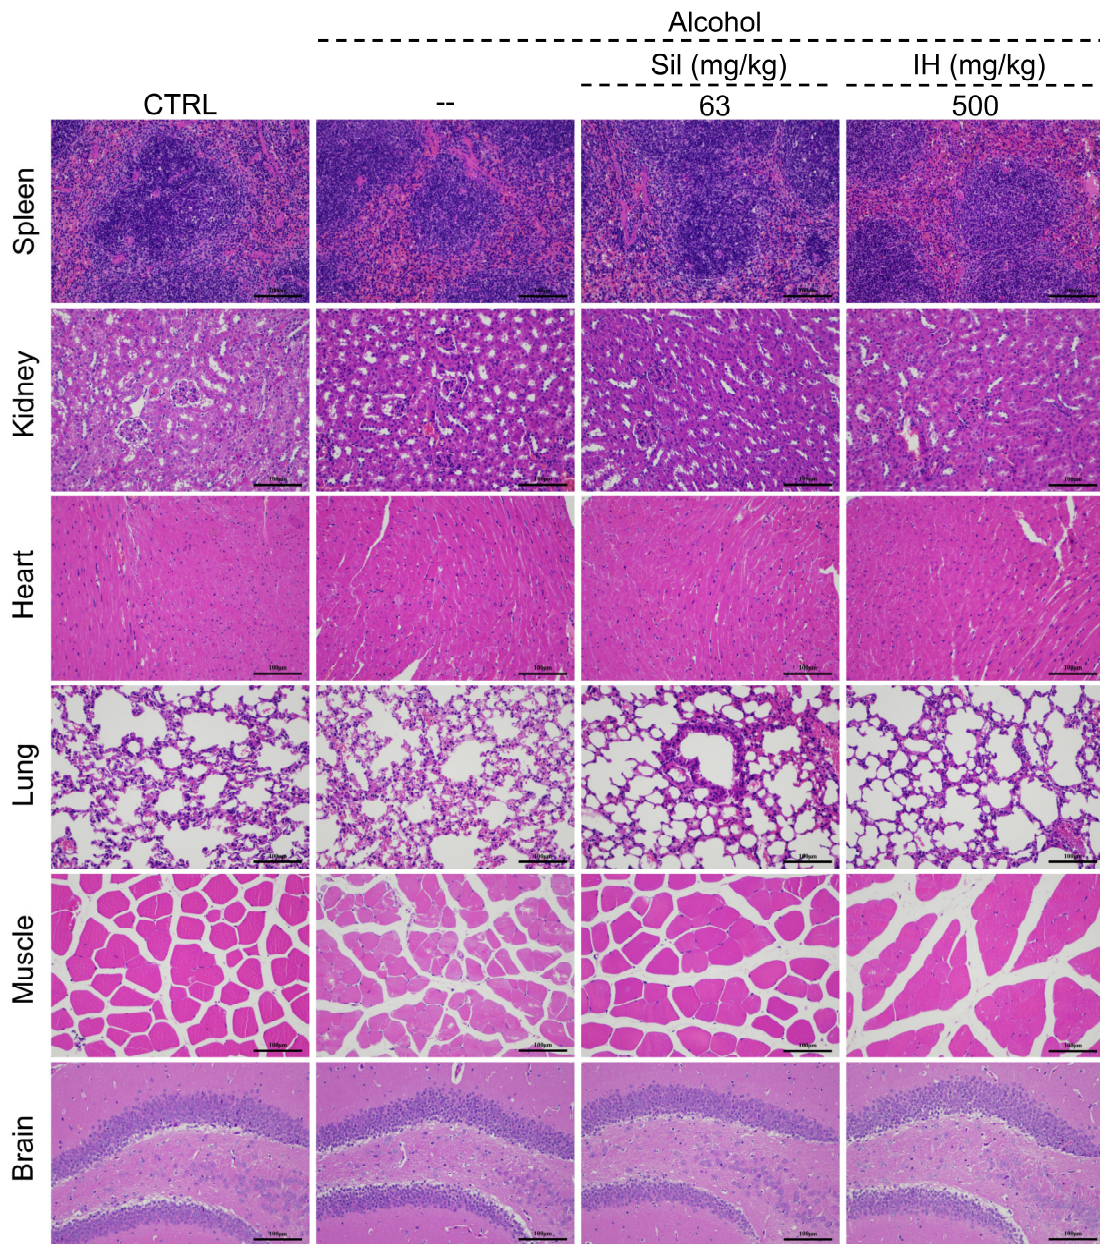

**Figure S1.** Histopathological analysis of the organs (spleen, kidneys, heart, lungs, brain, and muscle) of mice using H&E staining (200 $\times$ ; scale bar: 100  $\mu$ m) (n = 3).

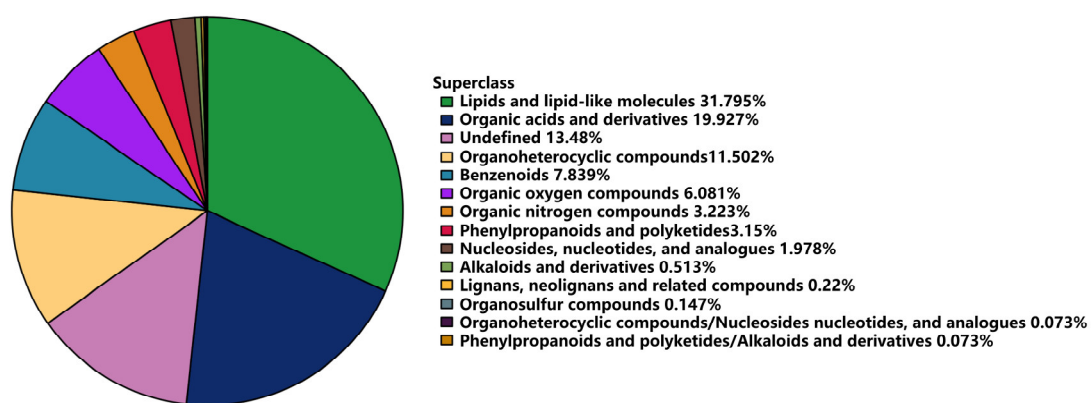

**Figure S2.** The proportion of identified metabolites in each chemical class.

**Table S1.** Details of the factors used in detection kits.

| Factors       | Catalog<br>number | Company                                    | Area           |
|---------------|-------------------|--------------------------------------------|----------------|
| AST           | C010-2-1          | Nanjing Jiancheng Bioengineering Institute | Nanjing, China |
| ALT           | C009-2-1          | Nanjing Jiancheng Bioengineering Institute | Nanjing, China |
| TG            | A110-1-1          | Nanjing Jiancheng Bioengineering Institute | Nanjing, China |
| TC            | A111-1-1          | Nanjing Jiancheng Bioengineering Institute | Nanjing, China |
| LDL-C         | A113-1-1          | Nanjing Jiancheng Bioengineering Institute | Nanjing, China |
| HDL-C         | A112-1-1          | Nanjing Jiancheng Bioengineering Institute | Nanjing, China |
| ADH           | G0874W            | Suzhou Grace Biotechnology Co., Ltd        | Suzhou, China  |
| IL-1 $\beta$  | 88-7013-88        | Thermo Fisher Scientific                   | MA, USA        |
| IL-6          | 88-7064-77        | Thermo Fisher Scientific                   | MA, USA        |
| TNF- $\alpha$ | 88-7324-77        | Thermo Fisher Scientific                   | MA, USA        |

**Table S2.** Details of antibodies used in Western blot and Immunohistochemistry (IHC).

| Antibody         | Molecular weight | Catalog number | Dilution for Western blot | Dilution for IHC | Company     | Area            |
|------------------|------------------|----------------|---------------------------|------------------|-------------|-----------------|
| IL-1 $\beta$     | 31 kDa           | A16288         | 1:2000                    | /                | Abclonal    | Wuhan, China    |
| IL-6             | 23 kDa           | bs-0782R       | 1:2000                    | /                | Bioss       | Beijing, China  |
| TNF- $\alpha$    | 17/25 kDa        | A0277          | 1:2000                    | /                | Abclonal    | Wuhan, China    |
| PPAR $\alpha$    | 52 kDa           | ab2779         | 1:500                     | 1:400            | Abcam       | Cambridge, UK   |
| P-STAT3          | 86 kDa           | AF3293         | 1:2000                    | 1:200            | Affinity    | Jiangsu, China  |
| T-STAT3          | 92 kDa           | 3096489        | 1:2000                    | /                | MILLIPORE   | Shanghai, China |
| P-JAK1           | 130/133 kDa      | AP0530         | 1:2000                    | /                | Abclonal    | Wuhan, China    |
| T-JAK1           | 133 kDa          | A5534          | 1:1000                    | /                | Abclonal    | Wuhan, China    |
| 15-PGDH          | 29 kDa           | A5024          | 1:2000                    | /                | Abclonal    | Wuhan, China    |
| $\beta$ -actin   | 43 kDa           | sc-47778       | 1:2000                    | /                | Santa Cruz  | TX, USA         |
| Goat Anti-Rabbit | /                | E-AB-1003      | 1:2000                    | 1:400            | Elabscience | Wuhan, China    |
| Goat-Anti-Mouse  | /                | E-AB-1001      | 1:2000                    | 1:400            | Elabscience | Wuhan, China    |

**Table S3.** Effects of IH on organ indices in mice with alcohol-induced chronic liver injury.

|        | CTRL        | Alcohol                    |                            |                            |
|--------|-------------|----------------------------|----------------------------|----------------------------|
|        |             | --                         | Sil (63mg/kg)              | IH (500mg/kg)              |
| Heart  | 0.565±0.010 | 0.615±0.013 <sup>#</sup>   | 0.562±0.012 <sup>*</sup>   | 0.546±0.016 <sup>**</sup>  |
| Liver  | 3.749±0.042 | 5.019±0.063 <sup>###</sup> | 4.439±0.089 <sup>***</sup> | 4.764±0.105                |
| Spleen | 0.286±0.006 | 0.237±0.007 <sup>###</sup> | 0.256±0.005                | 0.244±0.008                |
| Lung   | 0.537±0.015 | 0.658±0.024 <sup>###</sup> | 0.559±0.015 <sup>***</sup> | 0.583±0.008 <sup>**</sup>  |
| Kidney | 1.210±0.018 | 1.425±0.019 <sup>###</sup> | 1.302±0.018 <sup>***</sup> | 1.314±0.020 <sup>***</sup> |
| Thymus | 0.121±0.007 | 0.093±0.007 <sup>#</sup>   | 0.112±0.005                | 0.109±0.010                |

The data were analyzed using a one-way analysis of variance (ANOVA) and expressed as means ± S.E.M. <sup>#</sup>*P* < 0.05, <sup>###</sup>*P* < 0.001 vs. CTRL mice;

<sup>\*</sup>*P* < 0.05, <sup>\*\*</sup>*P* < 0.01, <sup>\*\*\*</sup>*P* < 0.001 vs. Alcohol mice.

**Table S4.** Relative abundances of the top 20 genera in the three groups.

| <b>Taxa</b>                       | <b>CTRL</b> | <b>Alcohol</b> | <b>Alcohol + IH</b> |
|-----------------------------------|-------------|----------------|---------------------|
| <i>Allobaculum</i>                | 0.198       | 0.063          | 0.068               |
| <i>Oscillospira</i>               | 0.029       | 0.073          | 0.046               |
| <i>Coprococcus</i>                | 0.012       | 0.036          | 0.057               |
| <i>Paraprevotella</i>             | 0.009       | 0.038          | 0.011               |
| <i>Bacteroides</i>                | 0.015       | 0.017          | 0.013               |
| <i>Desulfovibrio</i>              | 0.021       | 0.020          | 0.004               |
| <i>Lactobacillus</i>              | 0.016       | 0.008          | 0.010               |
| <i>Akkermansia</i>                | 0.002       | 0.027          | 0.002               |
| <i>Ruminococcus</i>               | 0.008       | 0.007          | 0.013               |
| <i>Clostridiaceae_Clostridium</i> | 0.005       | 0.006          | 0.012               |
| <i>Sutterella</i>                 | 0.008       | 0.008          | 0.004               |
| <i>Bifidobacterium</i>            | 0.001       | 0.003          | 0.015               |
| <i>Phascolarctobacterium</i>      | 0.005       | 0.000          | 0.012               |
| <i>Prevotella</i>                 | 0.002       | 0.004          | 0.009               |
| <i>Turicibacter</i>               | 0.002       | 0.003          | 0.007               |
| <i>Parabacteroides</i>            | 0.003       | 0.004          | 0.002               |
| <i>Alistipes</i>                  | 0.002       | 0.004          | 0.002               |
| <i>[Ruminococcus]</i>             | 0.004       | 0.002          | 0.001               |
| <i>Flexispira</i>                 | 0.002       | 0.002          | 0.002               |
| <i>Rikenella</i>                  | 0.001       | 0.002          | 0.002               |

Data are presented as the mean.

**Table S5.** Significantly different serum metabolites among three groups.

| Metabolites                                              | CTRL    | Alcohol | Alcohol + IH | CTRL vs Alcohol |                 | Alcohol vs Alcohol + IH |                 |
|----------------------------------------------------------|---------|---------|--------------|-----------------|-----------------|-------------------------|-----------------|
|                                                          |         |         |              | VIP             | <i>P</i> -value | VIP                     | <i>P</i> -value |
| 14-hydroxy-4z,7z,10z,12e,16z,19z-docosahexaenoic acid    | 319302  | 152253  | 280111       | 2.535           | 0.006           | 2.937                   | 0.010           |
| 8-hydroxy-5z,9e,11z,14z,17z-eicosapentaenoic acid        | 348249  | 190201  | 320936       | 2.432           | 0.004           | 2.894                   | 0.018           |
| 2-dhahma [dmed-fahfa]                                    | 456700  | 697868  | 325016       | 3.553           | 0.001           | 3.380                   | 0.024           |
| N-acetyl-l-methionine                                    | 17419   | 38533   | 23013        | 1.115           | 0.001           | 1.071                   | 0.024           |
| 2-oleoyl-1-stearoyl-sn-glycero-3-phosphoserine           | 183798  | 360380  | 252004       | 2.886           | 0.002           | 3.502                   | 0.034           |
| N-palmitoyl-d-erythro-dihydroceramide-1-phosphate        | 104406  | 152079  | 82078        | 1.495           | 0.003           | 2.713                   | 0.014           |
| L-dihydroorotate                                         | 1019771 | 694699  | 964423       | 4.276           | 0.004           | 4.637                   | 0.009           |
| 3-amino-2-(4-chlorophenyl)-2-hydroxypropanesulfonic acid | 62928   | 30797   | 53800        | 1.405           | 0.011           | 1.167                   | 0.033           |
| Pseudouridine                                            | 73606   | 50869   | 82612        | 1.025           | 0.029           | 1.647                   | 0.013           |
| Linolenic acid                                           | 1139523 | 741289  | 1115367      | 4.672           | 0.017           | 5.595                   | 0.094           |

Data are presented as the mean. The metabolites were significantly different when variable important in projection (VIP) > 1 and *p*-value < 0.05.
